# Supplementary material for: D-Ring-Modified Analogues of Luotonin A with Reduced Planarity: Design, Synthesis, and Evaluation of Their Topoisomerase Inhibition-Associated Cytotoxicity
Source: Hindawi journal article supplement (doi:10.1155/2019/2514524), 2019-11-13
Supplement: f1 [file 2514524.f1.pdf]

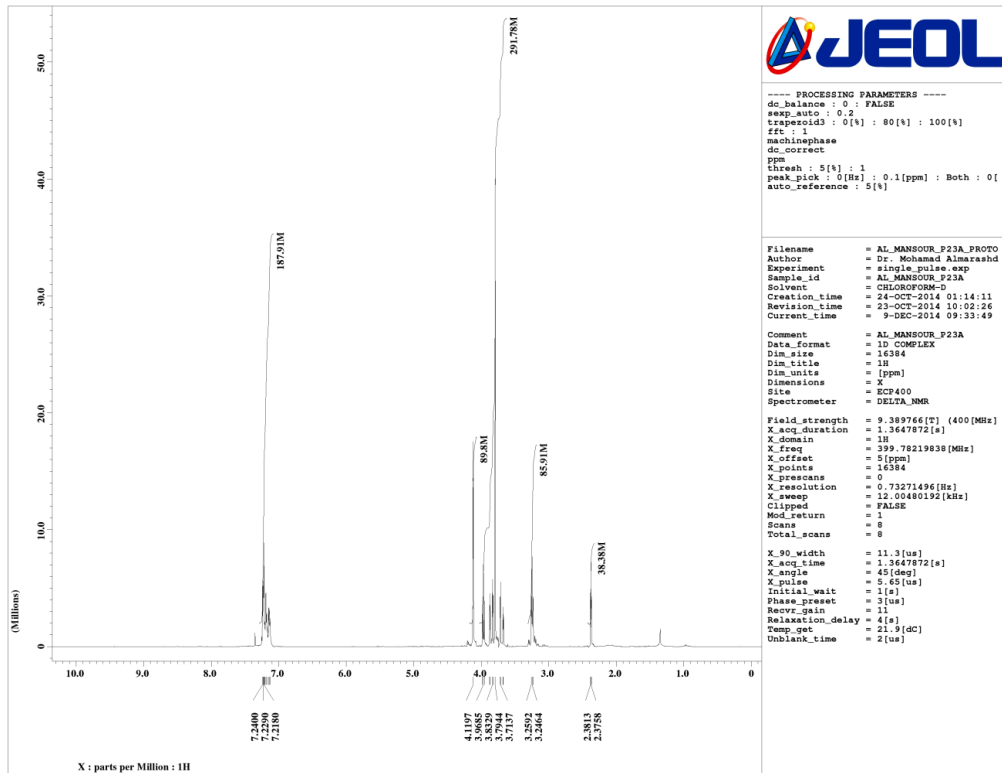

Figure S1 <sup>1</sup>H NMR spectrum of 4

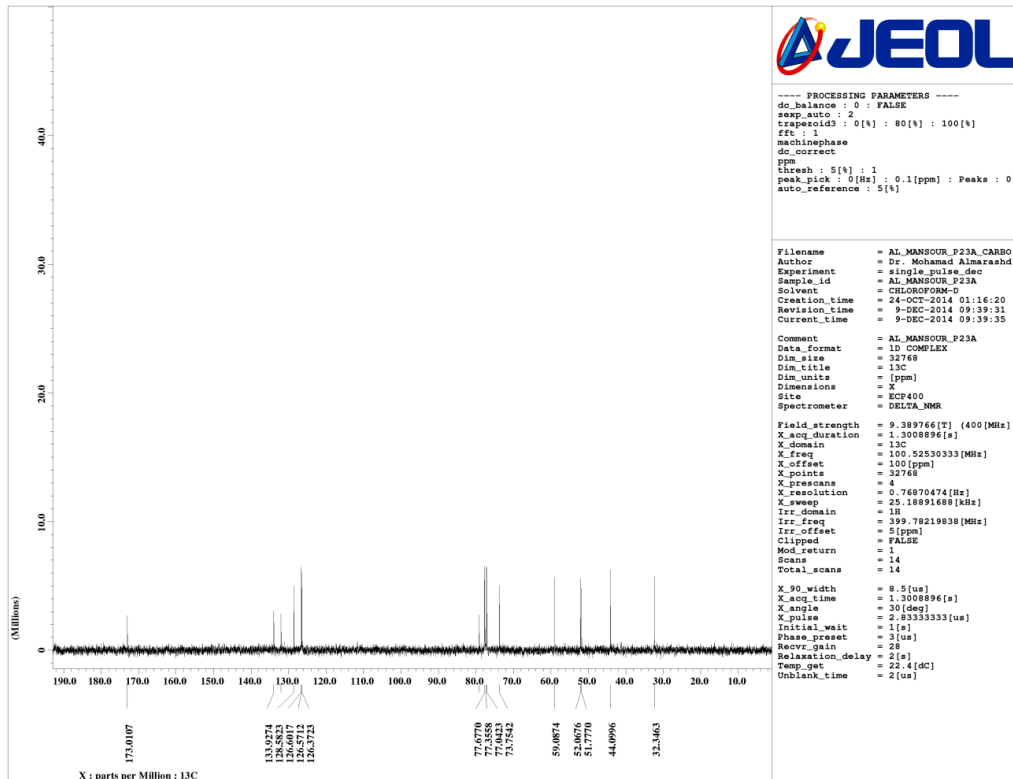

Figure S2 <sup>13</sup>C NMR spectrum of 4

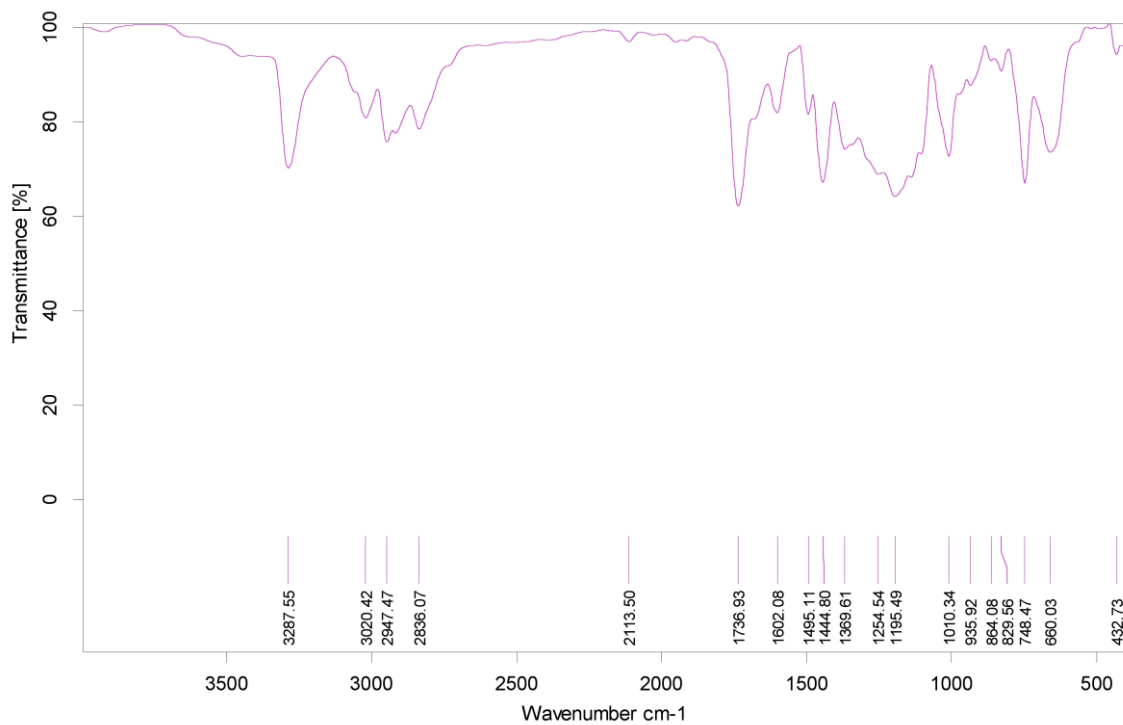

Figure S3 FT-IR spectrum of 4

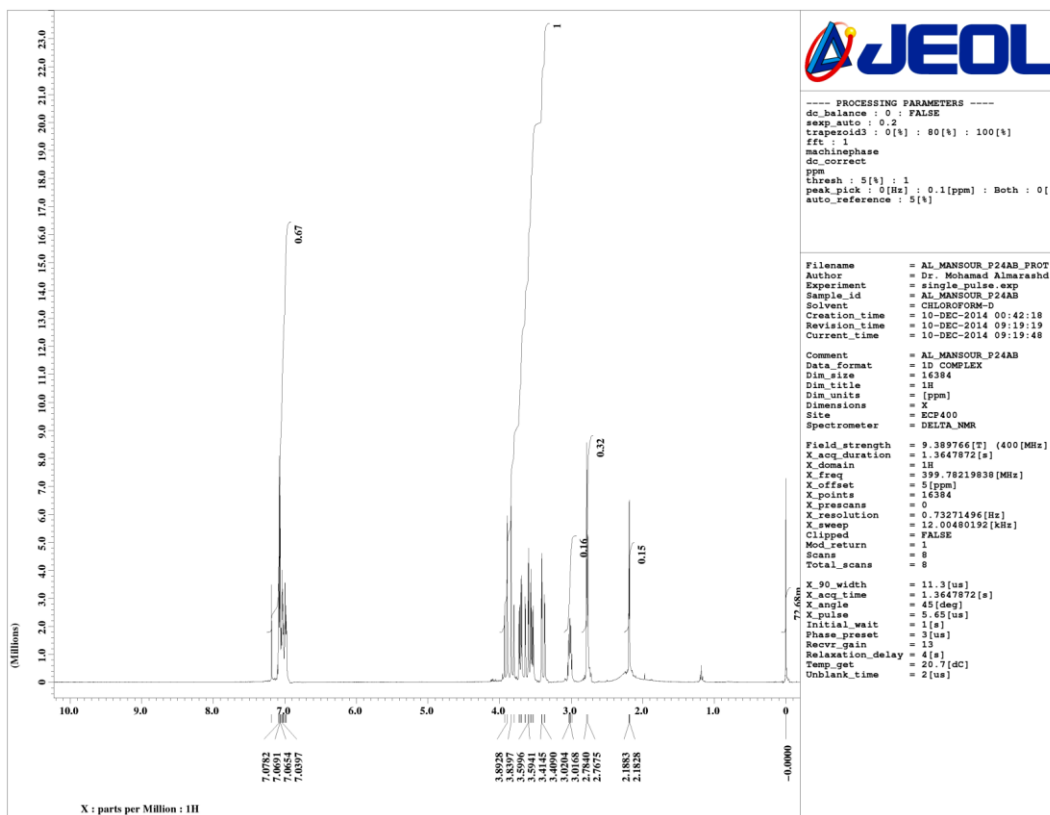

Figure S4 <sup>1</sup>H NMR spectrum of 5

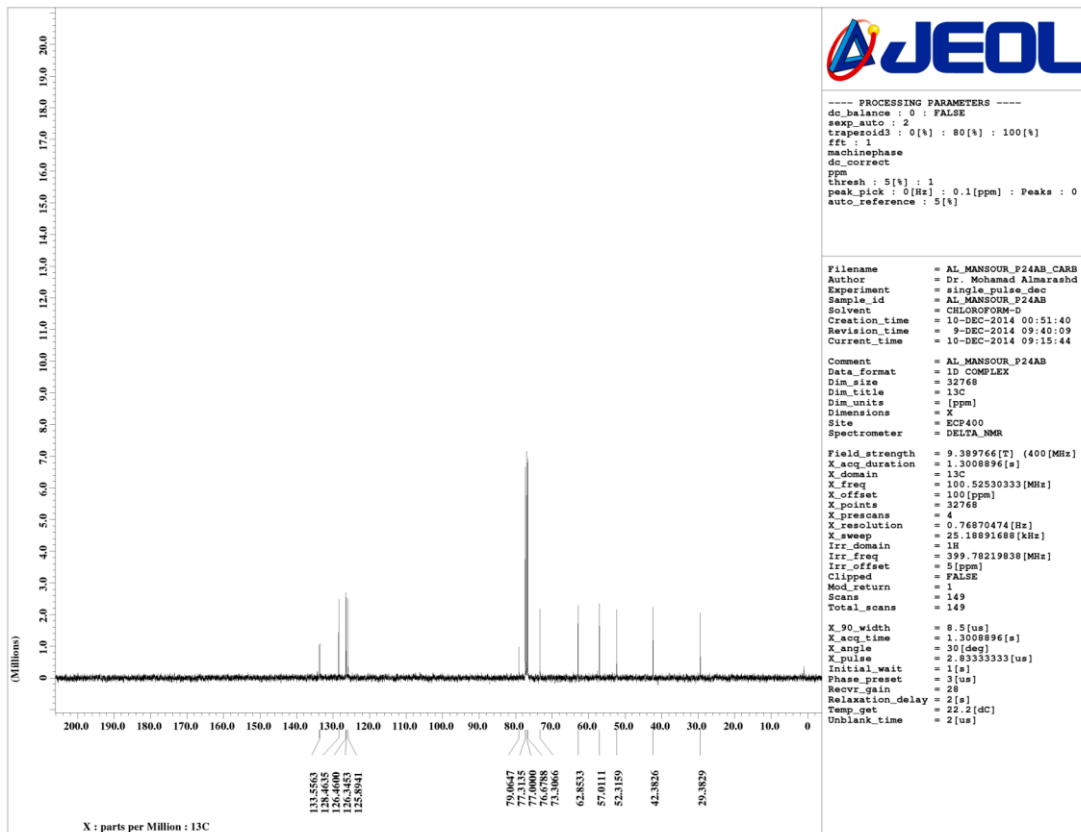

Figure S5  $^{13}\text{C}$  NMR spectrum of **5**

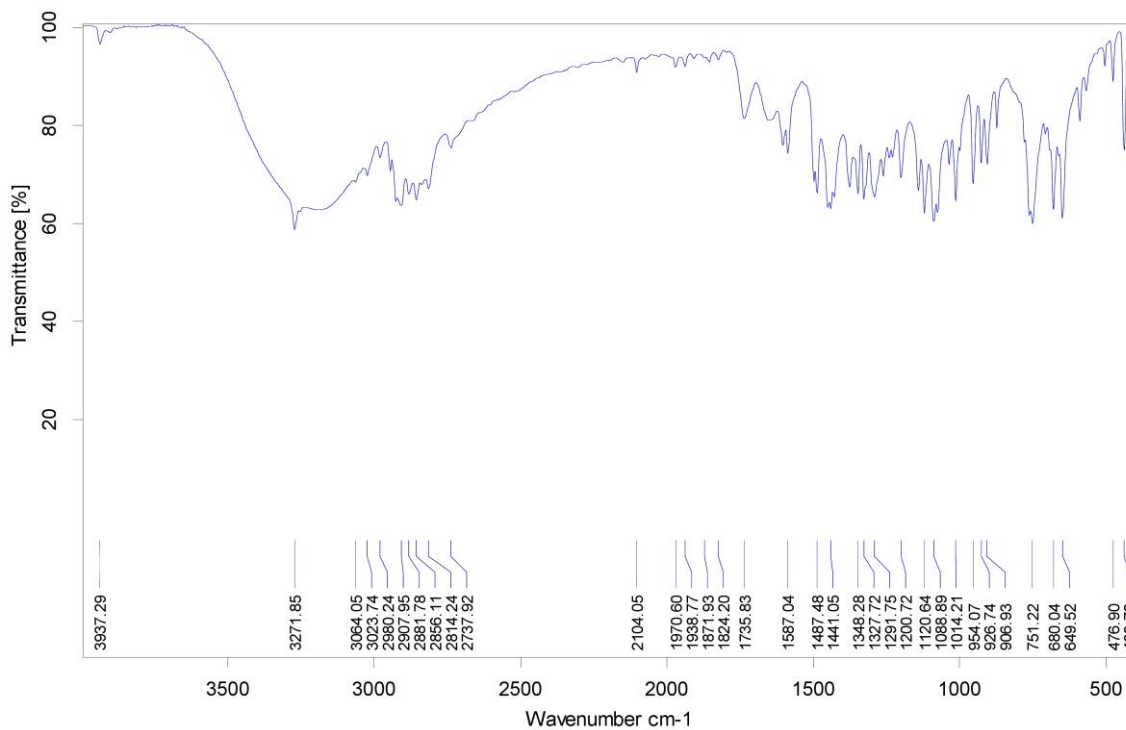

Figure S6 FT-IR spectrum of **5**

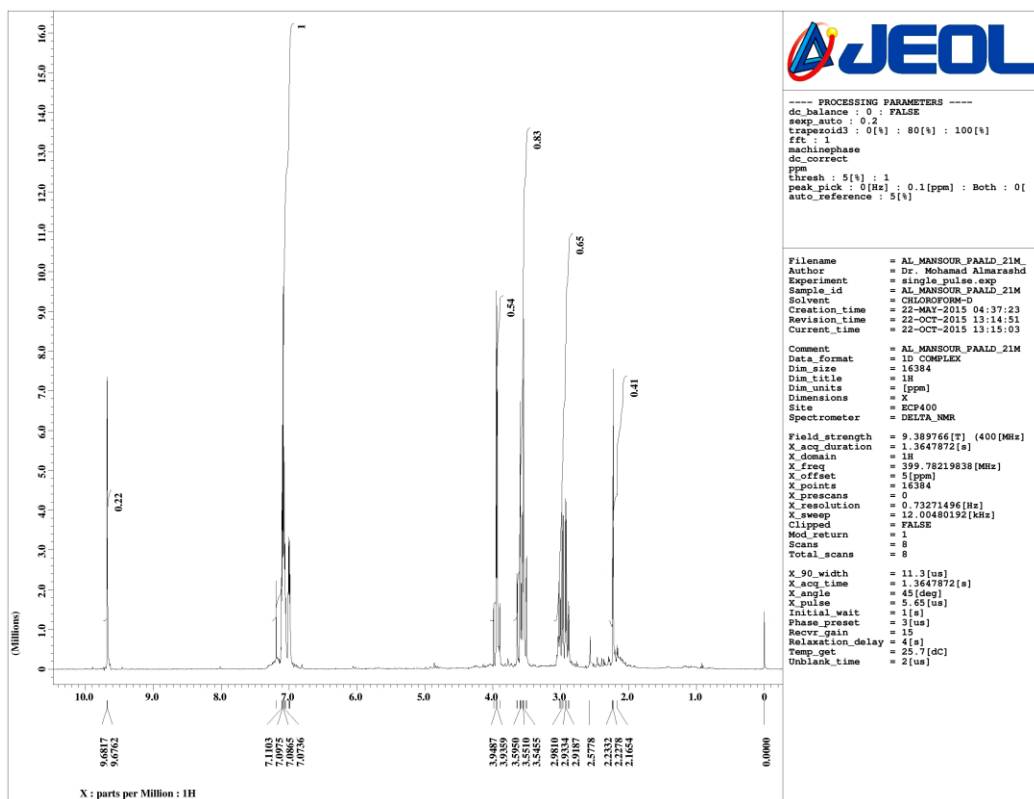

Figure S7 <sup>1</sup>H NMR spectrum of 6

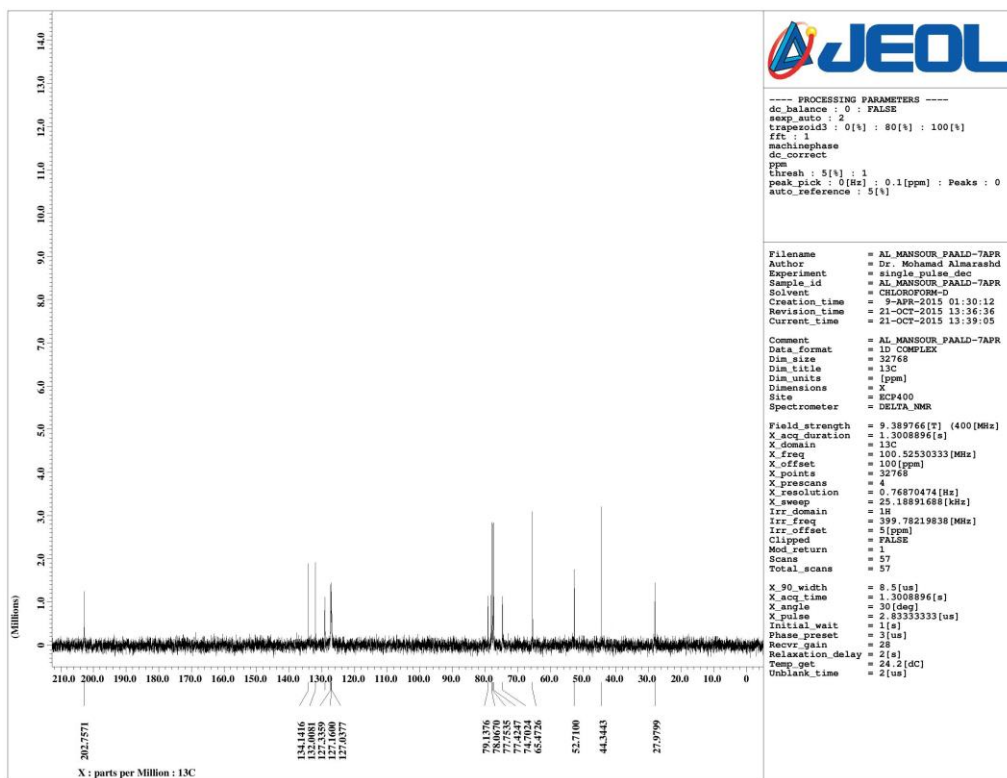

Figure S8 <sup>13</sup>C NMR spectrum of 6

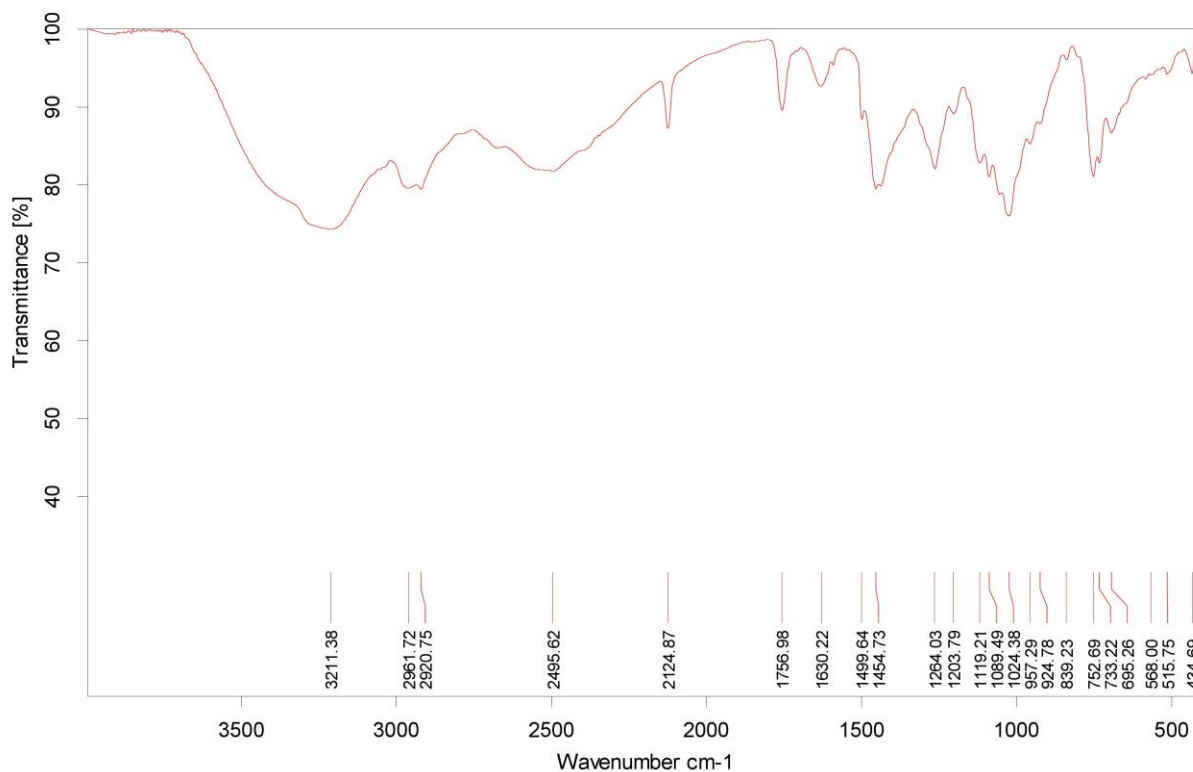

Figure S9 FT-IR spectrum of 6

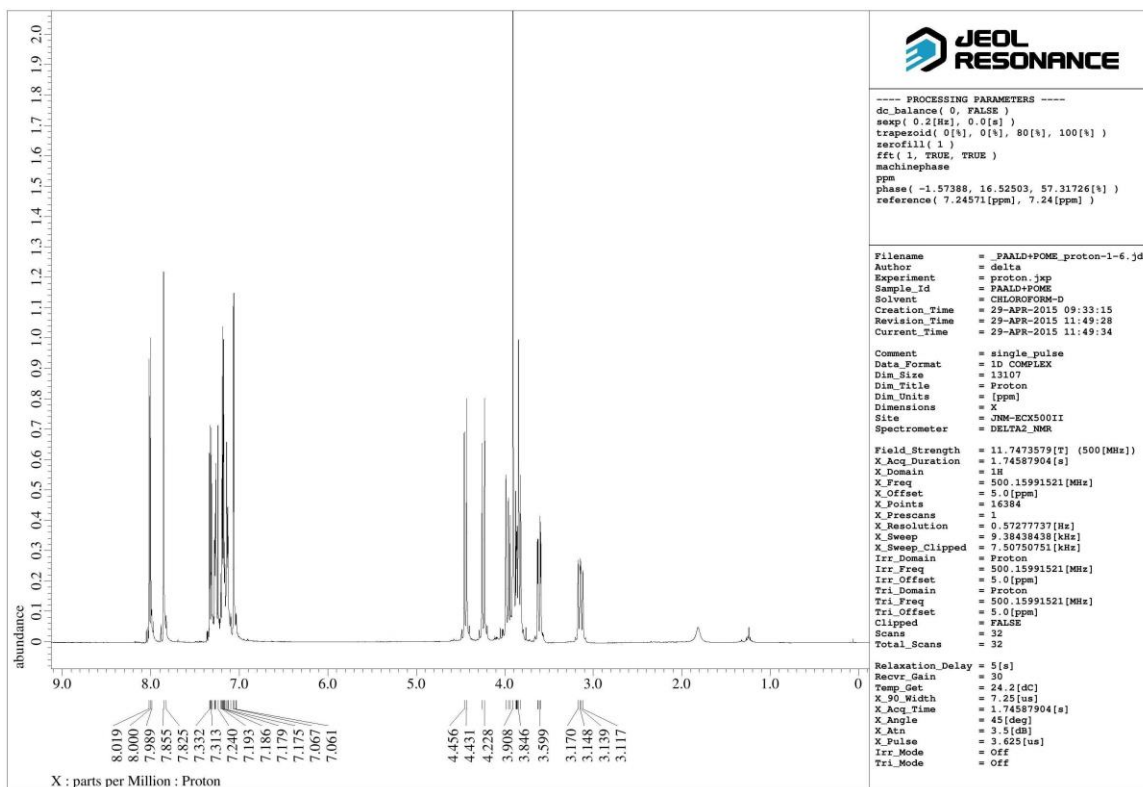

Figure S10 <sup>1</sup>H NMR spectrum of 8d

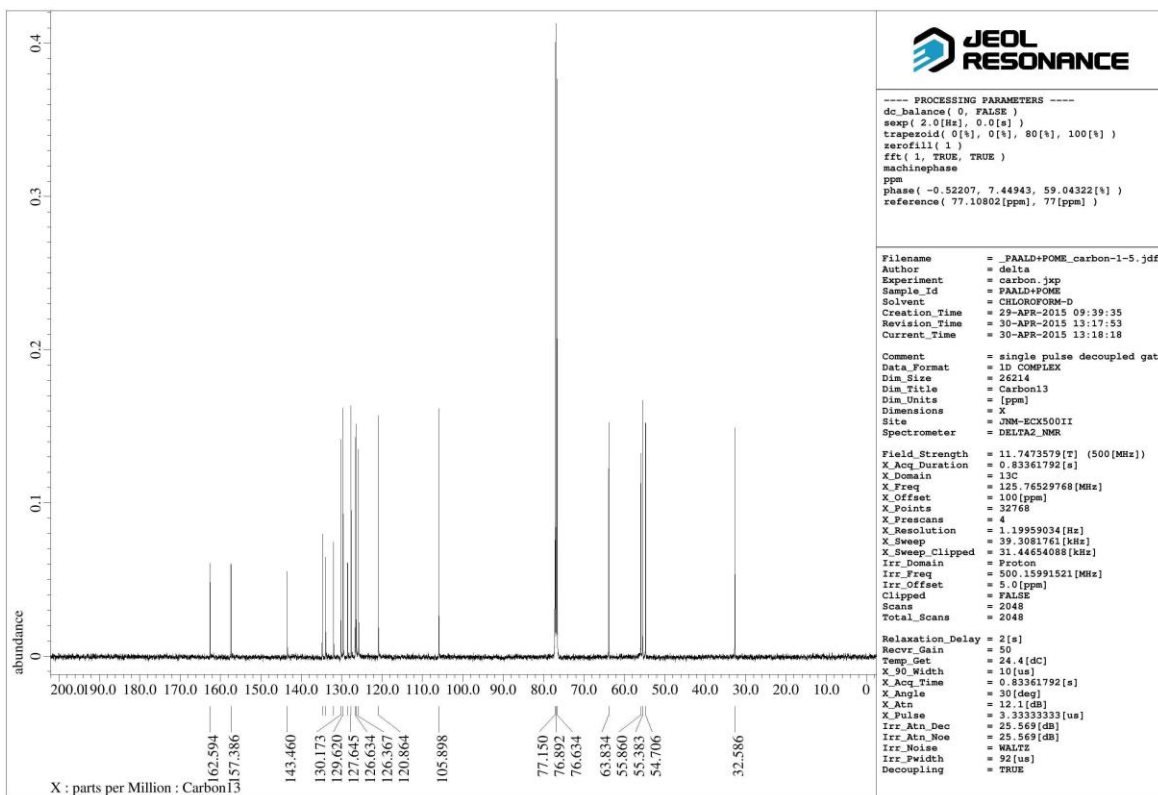

Figure S11  $^{13}\text{C}$  NMR spectrum of **8d**

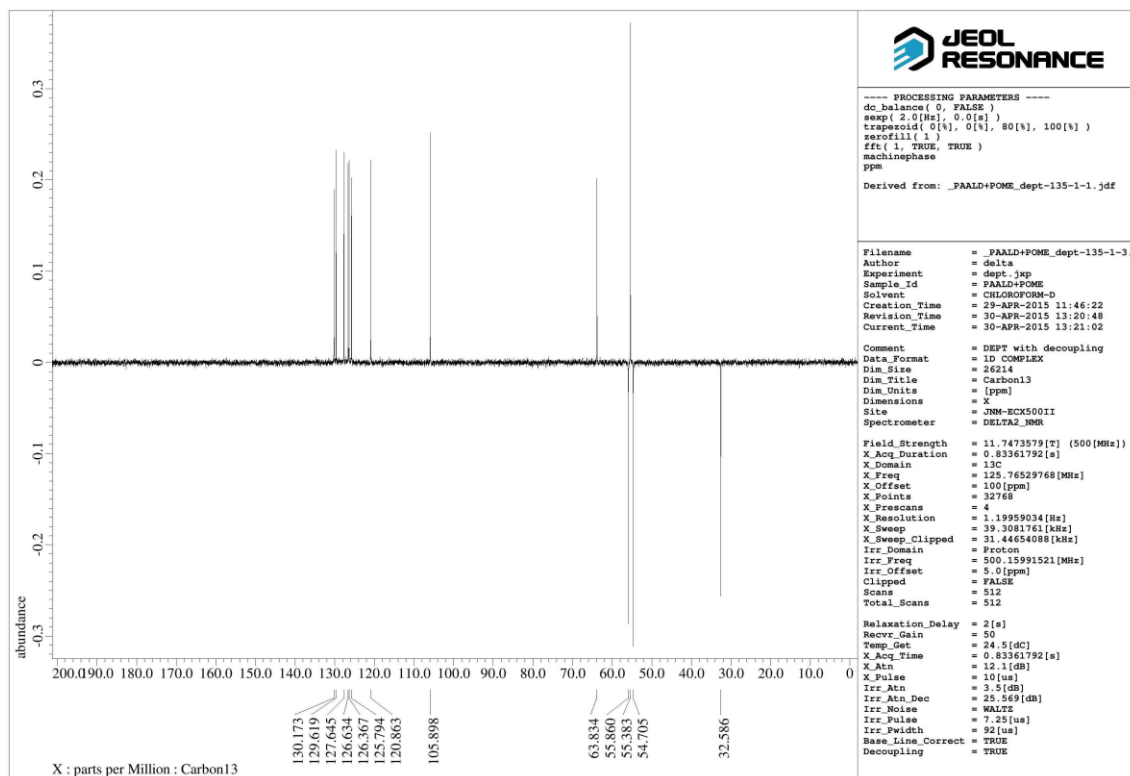

Figure S12 DEPT 135 NMR spectrum of **8d**

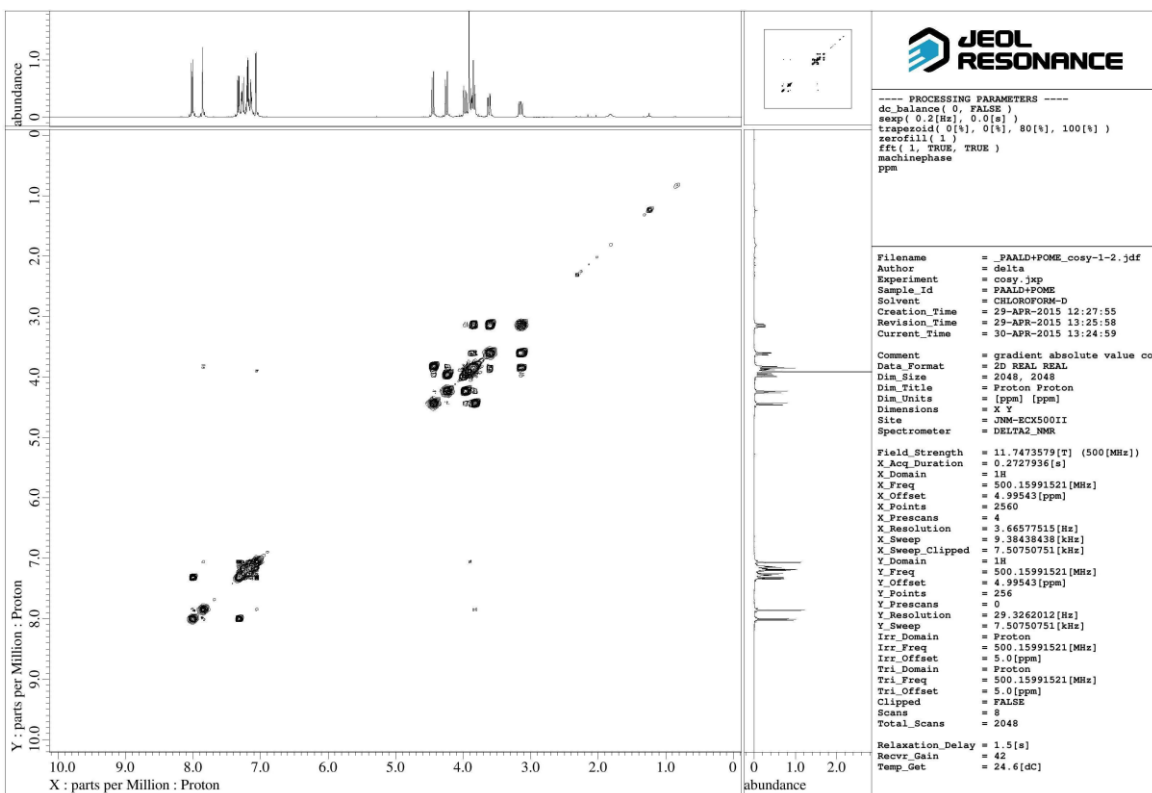

Figure S13 H-H COSY spectrum of **8d**

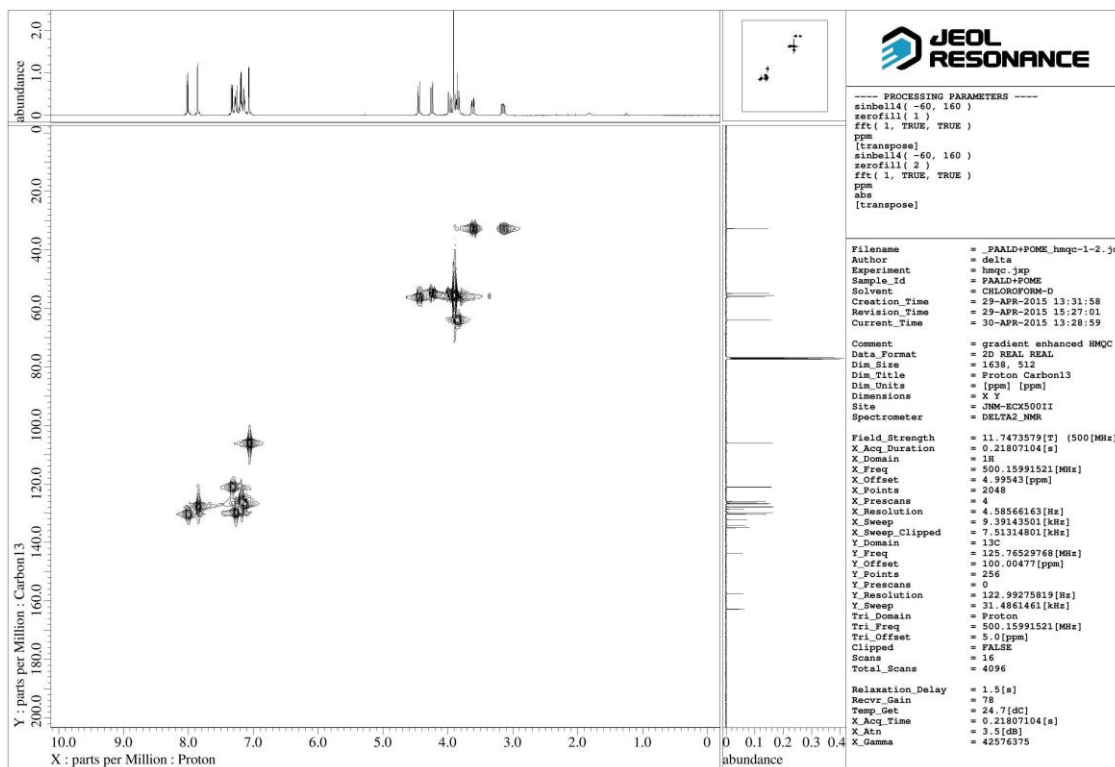

Figure S14 C-H COSY spectrum of **8d**

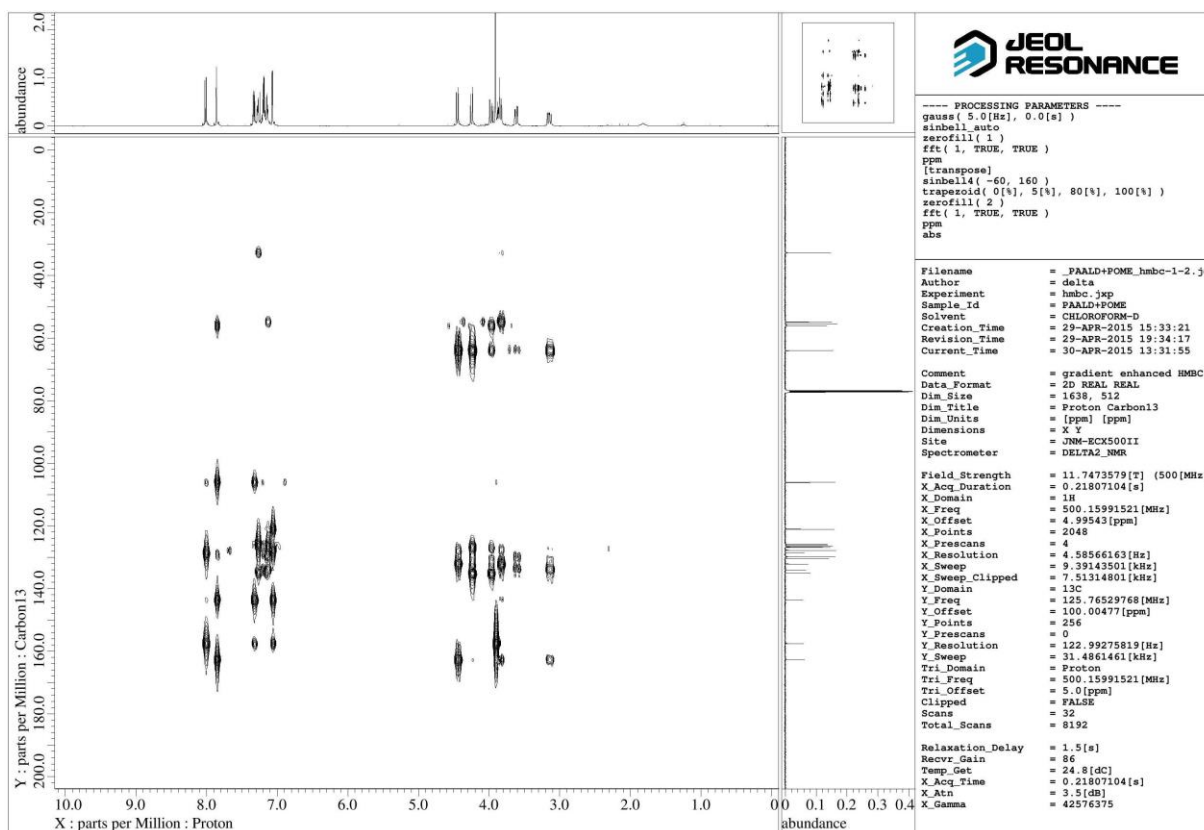

Figure S15 HMBC spectrum of **8d**

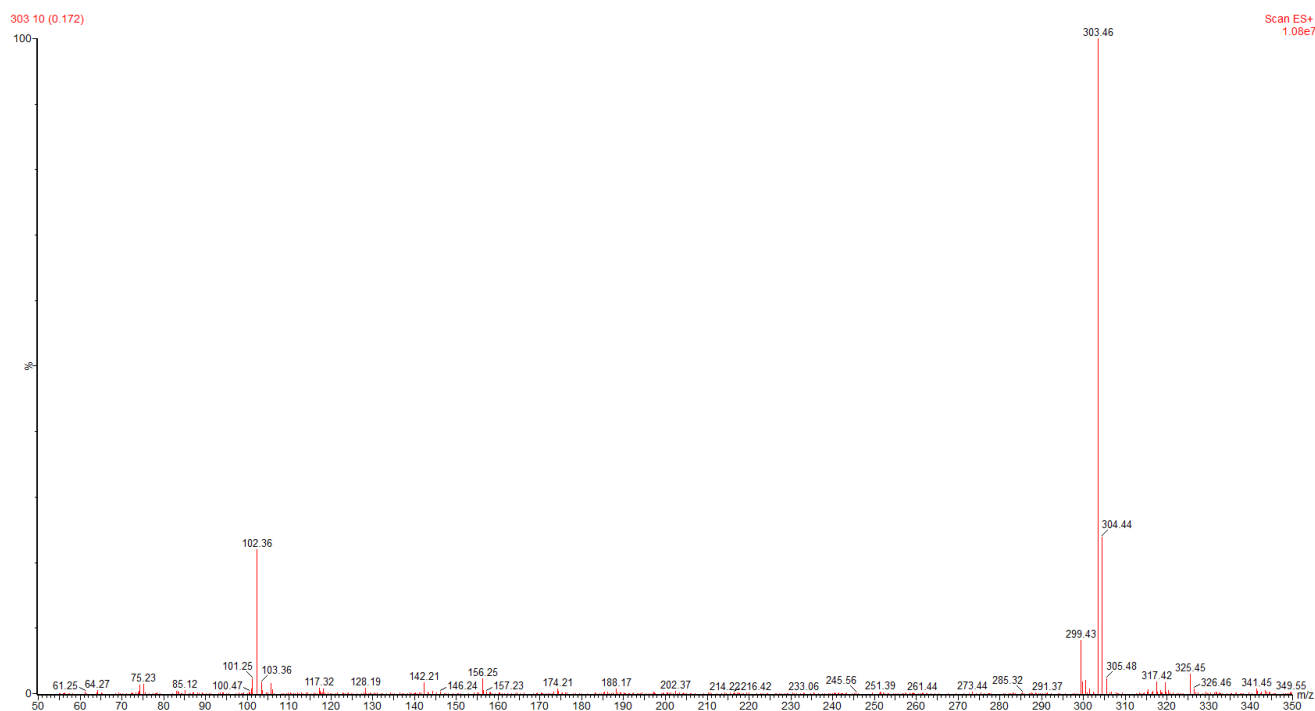

Figure S16 Mass spectrum of **8d**



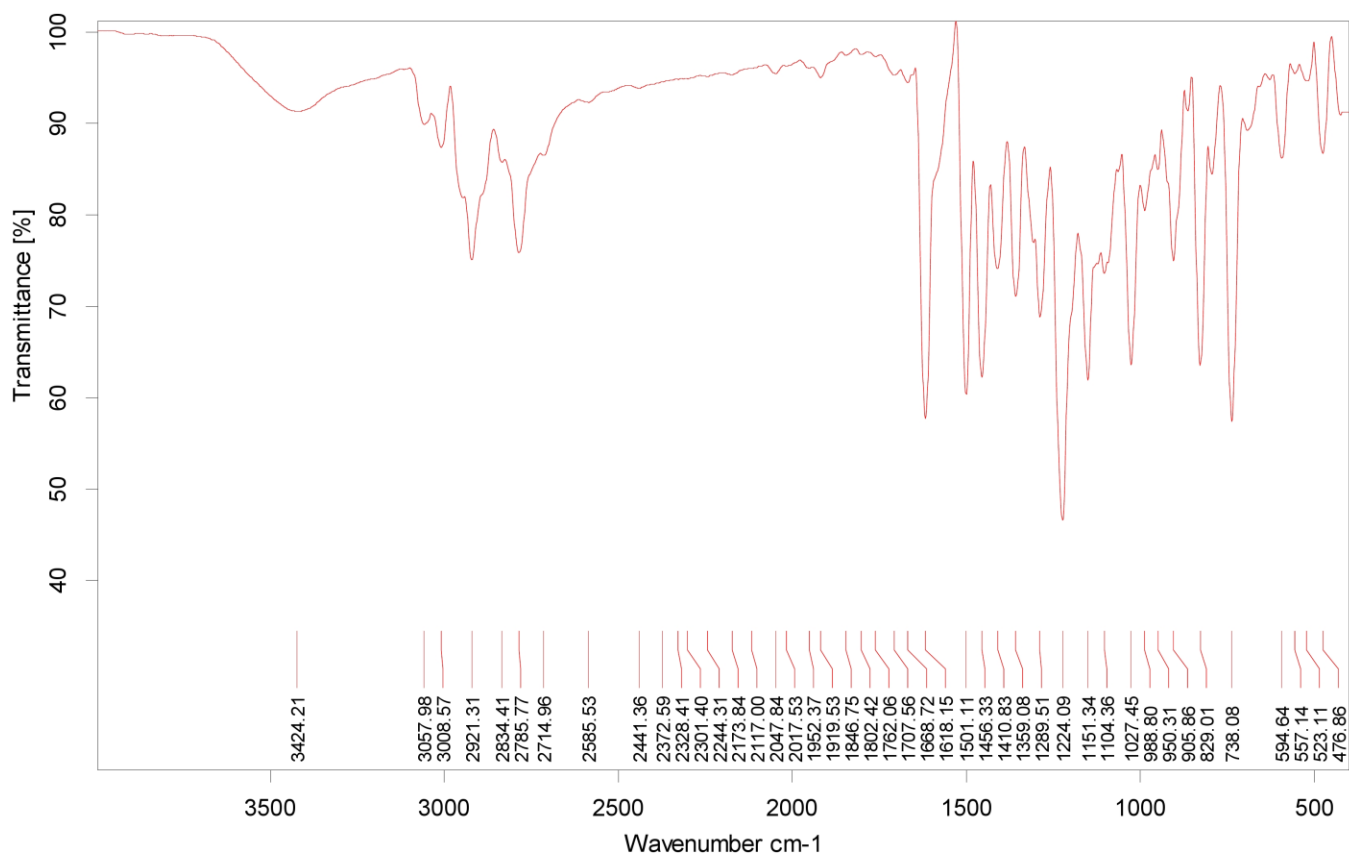

**Figure S17** FT-IR spectrum of **8d**

**Table S1** Experimental details

| <b>Crystal data</b>                                                                            |                                                                               |
|------------------------------------------------------------------------------------------------|-------------------------------------------------------------------------------|
| Chemical formula                                                                               | <u>C<sub>13</sub>H<sub>15</sub>NO</u>                                         |
| Mr                                                                                             | <u>201.26</u>                                                                 |
| Crystal system, space group                                                                    | <u>Orthorhombic, <i>P</i>2<sub>1</sub>2<sub>1</sub>2<sub>1</sub></u>          |
| Temperature (K)                                                                                | <u>150</u>                                                                    |
| <i>a</i> , <i>b</i> , <i>c</i> (Å)                                                             | <u>6.5618 (3), 7.9332 (3), 21.0134 (9)</u>                                    |
| <i>V</i> (Å <sup>3</sup> )                                                                     | <u>1093.88 (8)</u>                                                            |
| <i>Z</i>                                                                                       | <u>4</u>                                                                      |
| Radiation type                                                                                 | <u>Mo <i>K</i>α</u>                                                           |
| μ (mm <sup>-1</sup> )                                                                          | <u>0.08</u>                                                                   |
| Crystal size (mm)                                                                              | <u>0.67 × 0.42 × 0.21</u>                                                     |
| <b>Data collection</b>                                                                         |                                                                               |
| Diffractometer                                                                                 | <u>Bruker APEX-II D8 venture diffractometer</u>                               |
| Absorption correction                                                                          | <u>Multi-scan SADABS Bruker 2014</u>                                          |
| T <sub>min</sub> , T <sub>max</sub>                                                            | <u>0.94, 0.98</u>                                                             |
| No. of measured, independent and observed [ <i>I</i> > 2σ( <i>I</i> )] reflections             | <u>70825, 5294, 4966</u>                                                      |
| R <sub>int</sub>                                                                               | <u>0.031</u>                                                                  |
| <b>Refinement</b>                                                                              |                                                                               |
| R[ <i>F</i> <sup>2</sup> > 2σ( <i>F</i> <sup>2</sup> )], wR( <i>F</i> <sup>2</sup> ), <i>S</i> | <u>0.033, 0.093, 1.04</u>                                                     |
| No. of reflections                                                                             | <u>5294</u>                                                                   |
| No. of parameters                                                                              | <u>144</u>                                                                    |
| No. of restraints                                                                              | <u>0</u>                                                                      |
| H-atom treatment                                                                               | <u>H atoms treated by a mixture of independent and constrained refinement</u> |
| Δρ <sub>max</sub> , Δρ <sub>min</sub> (e Å <sup>-3</sup> )                                     | <u>0.30, -0.18</u>                                                            |

**Table S2** Geometric parameters (Å, °)

|             |             |               |             |
|-------------|-------------|---------------|-------------|
| O1—C10      | 1.4169 (12) | C6—C7         | 1.3977 (13) |
| O1—H101     | 0.84 (2)    | C6—H6A        | 0.9300      |
| N1—C11      | 1.4705 (13) | C7—C8         | 1.5022 (12) |
| N1—C1       | 1.4713 (11) | C8—C9         | 1.5223 (13) |
| N1—C9       | 1.4810 (12) | C8—H8A        | 0.9700      |
| C1—C2       | 1.5026 (13) | C8—H8B        | 0.9700      |
| C1—H1A      | 0.9700      | C9—C10        | 1.5226 (12) |
| C1—H1B      | 0.9700      | C9—H9A        | 0.9800      |
| C2—C7       | 1.3948 (12) | C10—H10A      | 0.9700      |
| C2—C3       | 1.3994 (12) | C10—H10B      | 0.9700      |
| C3—C4       | 1.3891 (15) | C11—C12       | 1.4736 (15) |
| C3—H3A      | 0.9300      | C11—H11A      | 0.9700      |
| C4—C5       | 1.3912 (16) | C11—H11B      | 0.9700      |
| C4—H4A      | 0.9300      | C12—C13       | 1.1967 (16) |
| C5—C6       | 1.3891 (14) | C13—H13       | 0.99 (2)    |
| C5—H5A      | 0.9300      |               |             |
| C10—O1—H101 | 107.8 (13)  | C6—C7—C8      | 120.60 (8)  |
| C11—N1—C1   | 109.22 (7)  | C7—C8—C9      | 112.75 (7)  |
| C11—N1—C9   | 113.40 (7)  | C7—C8—H8A     | 109.0       |
| C1—N1—C9    | 110.56 (7)  | C9—C8—H8A     | 109.0       |
| N1—C1—C2    | 113.40 (7)  | C7—C8—H8B     | 109.0       |
| N1—C1—H1A   | 108.9       | C9—C8—H8B     | 109.0       |
| C2—C1—H1A   | 108.9       | H8A—C8—H8B    | 107.8       |
| N1—C1—H1B   | 108.9       | N1—C9—C10     | 112.53 (8)  |
| C2—C1—H1B   | 108.9       | N1—C9—C8      | 107.90 (7)  |
| H1A—C1—H1B  | 107.7       | C10—C9—C8     | 110.48 (7)  |
| C7—C2—C3    | 119.33 (8)  | N1—C9—H9A     | 108.6       |
| C7—C2—C1    | 121.04 (7)  | C10—C9—H9A    | 108.6       |
| C3—C2—C1    | 119.59 (8)  | C8—C9—H9A     | 108.6       |
| C4—C3—C2    | 120.92 (9)  | O1—C10—C9     | 108.85 (7)  |
| C4—C3—H3A   | 119.5       | O1—C10—H10A   | 109.9       |
| C2—C3—H3A   | 119.5       | C9—C10—H10A   | 109.9       |
| C3—C4—C5    | 119.76 (9)  | O1—C10—H10B   | 109.9       |
| C3—C4—H4A   | 120.1       | C9—C10—H10B   | 109.9       |
| C5—C4—H4A   | 120.1       | H10A—C10—H10B | 108.3       |
| C6—C5—C4    | 119.57 (9)  | N1—C11—C12    | 114.27 (8)  |
| C6—C5—H5A   | 120.2       | N1—C11—H11A   | 108.7       |
| C4—C5—H5A   | 120.2       | C12—C11—H11A  | 108.7       |
| C5—C6—C7    | 121.04 (9)  | N1—C11—H11B   | 108.7       |
| C5—C6—H6A   | 119.5       | C12—C11—H11B  | 108.7       |
| C7—C6—H6A   | 119.5       | H11A—C11—H11B | 107.6       |
| C2—C7—C6    | 119.38 (8)  | C13—C12—C11   | 177.86 (12) |
| C2—C7—C8    | 120.01 (8)  | C12—C13—H13   | 175.1 (14)  |
